1 **DIFFERENCES IN NEURAL ACTIVITY, BUT NOT BEHAVIOR, ACROSS SOCIAL**  
2 **CONTEXTS IN GUPPIES, *POECILIA RETICULATA***

3

4 Eva K. Fischer<sup>1\*</sup>, Sarah E. Westrick<sup>2</sup>, Lauren Hartsough<sup>3</sup>, Kim L. Hoke<sup>4</sup>

5

6 <sup>1</sup> Stanford University, Stanford, CA

7 <sup>2</sup> University of Michigan, Ann Arbor, MI

8 <sup>3</sup> Vanderbilt University, Nashville, TN

9 <sup>4</sup> Colorado State University, Fort Collins, CO

10

11 \* Corresponding author:

12 Eva K. Fischer

13 Stanford University

14 304 Gilbert Building

15 371 Serra Mall

16 Stanford, CA 94305

17 email: [efisch@stanford.edu](mailto:efisch@stanford.edu)

18

19 **Running title:** Neural activation across social contexts

20

21 **Key words:** social behavior, neural activation, preoptic area, teleost, *Poecilia reticulata*, guppy

## 22 **Summary statement**

23 Activity in distinct brain regions reflects behavioral context versus social motivation in a in which  
24 behavioral repertoires are shared across social contexts (Trinidadian guppies, *Poecilia reticulata*).

25

26

## 27 **Abstract**

28 Animals are continually faced with the challenge of producing context-appropriate social  
29 behaviors. In many instances, animals produce unrelated behaviors across contexts. However, in  
30 some instances the same behaviors are produced across different social contexts, albeit in response  
31 to distinct stimuli and with distinct purposes. We took advantage of behavioral similarities across  
32 mating and aggression contexts in guppies, *Poecilia reticulata*, to understand how patterns of  
33 neural induction differ across social contexts when behaviors are nonetheless shared across  
34 contexts. While these is growing interest in understanding behavioral mechanisms in guppies,  
35 resources are sparse. As part of this study, we developed a neuroanatomical atlas of the guppy  
36 brain as a research community resource. Using this atlas, we found that neural activity in the  
37 preoptic area reflected social context, whereas individual differences in behavioral motivation  
38 paralleled activity in the posterior tuberculum and ventral telencephalon (teleost homologs of the  
39 ventral tegmental area and lateral septum, respectively). Our findings suggest independent coding  
40 of social salience versus behavioral motivation when behavioral repertoires are shared across  
41 social contexts.

42

43

## 44 **Introduction**

45 Producing behaviors appropriate to the current social context is a central challenge for  
46 animals, requiring the integration of both internal and external cues. Integrating cues from  
47 conspecifics is particularly critical, as interactions with potential mates, competitors, and offspring  
48 generally require distinct behavioral repertoires and physiological states. However, in some  
49 instances, similar behaviors are deployed across social contexts, albeit with distinct purposes. For  
50 example, frogs, birds, rodents, and humans produce similar vocalizations in the context of mate  
51 attraction and territory defense (Catchpole, 2008; Portfors, 2007; Wells, 2007). While behaviors  
52 are the same across contexts in these cases, they are produced in response to distinct stimuli,

53 indicating that divergent sensory inputs are converted into similar behavioral outputs while  
54 presumably simultaneously maintaining information concerning social salience. Thus, the neural  
55 underpinnings promoting context-dependent behaviors are particularly intriguing in these  
56 situations, where seemingly identical behaviors are performed across clearly distinct social  
57 contexts.

58 Trinidadian guppies, *Poecilia reticulata*, perform similar, highly stereotyped behaviors during  
59 mating and aggressive interactions, and provide an excellent system in which to examine how  
60 social salience is reflected in the brain when behaviors are shared across contexts. Trinidadian  
61 guppies have become a model system in evolutionary ecology and behavior. Owing to extensive  
62 work in both the wild and the lab, much is known about the environmental cues influencing  
63 behaviors and the ultimate adaptive significance of these behaviors in this species (Houde, 1997;  
64 Magurran, 2005). Guppies are live-bearing fish with internal fertilization, and males spend the  
65 majority of their time in pursuit of females. Male guppies display a stereotyped courtship behavior  
66 known as a sigmoid display, during which they orient themselves perpendicular to a female,  
67 assume the characteristic S-shape that gives the display its name, and quiver their bodies. As an  
68 alternative to these overt courtship displays, male guppies also attempt to gain fertilizations by  
69 forced/sneaky copulation. In this case, males approach females from behind and below and thrust  
70 their gonopodium (intromittent organ) forward toward the female's genital pore. In addition, males  
71 will bite, head-butt, and body-slam females to get their attention (reviewed in Houde, 1997).  
72 Despite obvious functional differences, male guppies perform a strikingly similar set of behaviors  
73 in aggressive competitions with other males: courtship displays, forced copulation attempts, and  
74 physical contacts serve to achieve successful copulations in a mating context and to establish  
75 dominance hierarchies in an aggressive context (Houde, 1988; Houde, 1997).

76 Given overlap at the behavioral level, how are male guppies nonetheless attuned to obvious  
77 contextual differences between mating and aggressive interactions? In the present study, we  
78 examine the neural mechanisms mediating behavior across social contexts in guppies. We begin  
79 by characterizing behavior in mating versus aggressive contexts. Using an atlas of the guppy brain  
80 we constructed, we next describe patterns of neural activation associated with mating versus  
81 aggressive contexts across 13 brain regions. We focus our analysis on brain regions mediating  
82 social behaviors that are evolutionarily ancient and functionally conserved across vertebrates (the  
83 Social Decision Making Network, SDMN; O'Connell and Hofmann, 2011). Finally, we combine

84 behavioral measures with neural activity data to understand associations between neural induction  
85 and behavioral output. The results of this study build resources for future work examining neural  
86 mechanisms of behavior in this increasingly popular system and provide insights into how distinct  
87 brain regions can contribute to social context versus social motivation.

88

89

## 90 **Materials and methods**

### 91 *Animals*

92 All fish used in this study were sexually mature males from a single lab-reared population derived  
93 from the Marianne River Drainage in the Northern Range Mountains of Trinidad. Fish were housed  
94 on a 12:12 hour light cycle (lights on 7:00am to 7:00pm) and fed a measured food diet once daily.  
95 Fish received Tetramin™ tropical flake paste and hatched *Artemia* cysts on an alternating basis.  
96 All animal husbandry, experimental methods, and tissue collection procedures were approved by  
97 the Colorado State University Animal Care and Use Committee (Approval #12-3818A).

98

99

### 100 *Behavior*

101 Males were assigned to one of three experimental groups: aggression, mating, or isolation (n=10  
102 per group). Fish were assayed concurrently in sets of three per day, with one representative from  
103 each experimental condition. Fish were placed in individual 2.5 liter tanks on the afternoon  
104 preceding behavioral trials. Behavioral trials were conducted the following morning, two hours  
105 after lights-on and lasted 60 minutes thereafter. In the aggression condition, two unfamiliar males  
106 were introduced into the focal male's tank at the start of the trial. In the mating condition, two  
107 unfamiliar females were introduced. In the isolation condition males remained isolated in their  
108 tanks throughout the trial. Behaviors were continuously recorded by two independent observers  
109 using JWatcher™ software. Each observer watched either the aggression or the mating condition  
110 at alternating 15 minute intervals, such that behaviors recorded for each social condition were  
111 evenly distributed among observers. Tanks were isolated from one another by opaque barriers so  
112 fish could not see one another and behavioral trials were conducted behind a blind with tanks lit  
113 from above to reduce visibility of the observers to the fish.

114 We followed behavioral protocols previously established in our lab to define and record behaviors  
115 (Fischer et al., 2016). Previous work in our lab demonstrates that guppies perform similar  
116 behaviors in aggression and mating contexts and so the same behaviors were scored in both  
117 contexts. These included the number and duration of sigmoid displays, the number of forced  
118 copulation attempts, the number of gonopodial swings, the number of aggressive contacts (biting,  
119 head-butting, body slamming, tail slapping), and the number of posturing incidents (when fish line  
120 up nose to nose).

121

### 122 *Tissue collection*

123 Whole brains were collected immediately following behavioral trials. Guppies were anesthetized  
124 by rapid cooling, followed by decapitation. Whole heads were fixed in 4% paraformaldehyde at  
125 4°C overnight and then transferred to 30% sucrose for dehydration. Following dehydration, whole  
126 heads were embedded in mounting media (Tissue-Tek® O.C.T. Compound, Electron Microscopy  
127 Sciences, Hatfield, PA, USA), rapidly frozen, and stored at -80°C until cryosectioning. Heads were  
128 sectioned in the coronal plane at 14µm, thaw mounted serially onto charged slides (Superfrost  
129 Plus, VWR, Randor, PA, USA), and stored at -20°C until immunohistochemical staining.

130

### 131 *Immunohistochemistry*

132 We used a phospho-S6 antibody that targets phosphorylated ribosomes (pS6; Life Technologies,  
133 Carlsbad, CA, USA) to assay neural activity. Ribosomes become phosphorylated following  
134 changes in electrical activity in neurons and the pS6 antibody therefore acts as a general marker of  
135 neural activation, akin to immediate early genes (Knight et al., 2012). As time course is critical for  
136 experiments involving immediate early genes and can vary across species, we assessed staining  
137 intensity at three timepoints (30, 60, and 90 minutes) in sample guppy tissue prior to the experiment  
138 and chose the 60-minute time point based on these preliminary results (data not shown).

139 We followed standard immunohistochemical procedures for antibody staining to label pS6-  
140 positive neurons. Briefly, we quenched endogenous peroxidases using a 3% H<sub>2</sub>O<sub>2</sub> solution,  
141 blocked slides in 5% normal goat serum diluted in 1X phosphate-buffered saline (PBS) and 0.03%  
142 tween for one hour, and then incubated slides in the anti-pS6 primary antibody (Life Technologies,  
143 Waltham, MA, USA) at a concentration of 1:500 in blocking solution overnight at 4°C. The  
144 following day, we incubated slides in secondary antibody (Jackson ImmunoResearch, West Grove,

145 PA, USA) at a concentration of 1:200 in blocking solution for two hours, incubated slides in an  
146 avidin-biotin complex (ABC) solution (Vector Laboratories, Burlingame, CA, USA) for two  
147 hours, and treated slides with 3,3'-diaminobenzidine (DAB; Vector Laboratories, Burlingame, CA,  
148 USA) for five minutes to produce a color reaction. Slides were rinsed in 1X PBS prior to and  
149 following all the above steps. Finally, slides were rinsed in water, dehydrated in increasing  
150 concentrations of ethanol (50%, 75%, 95%, 100%, 100%), and coverslipped with Permount (Fisher  
151 Scientific, Hampton, NH, USA).

152

### 153 *Microscopy and cell counting*

154 To reliably quantify neural activity across candidate brain regions, we created a guppy brain atlas  
155 (Supplemental Materials). We examined coronal brain sections of multiple male and female  
156 guppies stained using cresyl violet to assess morphology. We identified brain regions using  
157 neuroanatomical information from other fishes (Anken and Rahmann, 1994; Munchrath and  
158 Hofmann, 2010; Wullimann et al., 1996) and have made the atlas freely available online.

159 We photographed brain tissue at 20x magnification on a light microscope (Zeiss AxioZoom,  
160 Zeiss, Oberkochen, Germany) attached to a camera (ORCA-ER, Hamamatsu, San Jose, CA, USA)  
161 and analyzed cell counts from photographs using FIJI software (Schindelin et al., 2012). We  
162 outlined and measured focal brain regions (Fig. 1) and counted all stained cells within a given  
163 region. All regions extended across multiple sections and we quantified cell number for each  
164 region in all possible sections. We counted cells in only a single hemisphere per section.

165

### 166 *Statistical Analysis*

167 We tested for the influence of social context (aggression versus mating) on behavior using  
168 generalized linear mixed models with a negative binomial distribution appropriate for count data  
169 with unequal variances. We tested for differences in the number of times each behavior was  
170 performed during the 60-minute trial. In addition, we summed the counts of all behaviors into a  
171 single total behavioral metric to assess overall behavioral activity. We chose this approach as (1)  
172 summing preserves the count nature of the original data, and (2) we have previously shown – and  
173 confirmed with exploratory analyses here – that the correlations between behaviors are not  
174 consistent across contexts and therefore the same principal components or factors cannot  
175 accurately summarize behavioral variation across experimental groups.

176 We used linear mixed models with a negative binomial distribution to test for differences in  
177 neural activation based on social context (aggression versus mating versus isolation). The model  
178 included social context and brain region as independent variables and the number of pS6-positive  
179 cells in each section as the dependent variable. We included fish identity as a random effect to  
180 control for repeated sampling within and among regions. As we expected that only some regions  
181 would show activation differences based on social context, we used Tukey-corrected posthoc tests  
182 to examine differences in a region-specific manner.

183 Finally, we tested whether activation in some regions predicted individual differences in  
184 behavior. To do this, we ran separate models for each brain region, in which the number of pS6-  
185 positive cells per region, social context, and their interaction predicted the total number of  
186 behaviors during the trial. We excluded fish from the isolation treatment for this analysis because  
187 we had no behavioral data for these fish. We chose to use our total behavioral metric because (1)  
188 we wanted to use a metric that reflected general behavioral motivation, and (2) this approach  
189 increased the power of the statistical analysis. All statistical analyses were performed in SAS 9.4  
190 (SAS Institute, Cary, NC, USA).

191

192

## 193 **Results**

194 Fish performed similar behaviors between aggressive and mating contexts, and we observed no  
195 statistically significant differences ( $p < 0.05$ ) in the number of single or overall behaviors performed  
196 across mating and aggressive contexts (Table 1).

197 We assessed differences in neural activation among social contexts (aggression, mating,  
198 isolation) by quantifying region-specific pS6 immunoreactivity. Social context influenced neural  
199 induction of pS6 in a brain region-specific manner (context\*region:  $F_{24,1778} = 3.70$ ,  $p < 0.0001$ ).  
200 Posthoc analyses (Table 2) revealed that region-specific differences were significant in the  
201 preoptic area (POA;  $F_{2,1778} = 6.47$ ,  $p = 0.0016$ ): Fish in the mating context had higher pS6 activation  
202 in the POA compared to fish in the aggression ( $t = 2.79$ , adj  $p = 0.015$ ) or isolation ( $t = 3.35$ , adj  
203  $p = 0.0024$ ) context, which did not significantly differ in their extent of neural activation ( $t = 0.53$ ,  
204 adj  $p = 0.8569$ ) (Fig. 2).

205 Finally, we tested for both context-dependent and context-independent relationships between  
206 pS6 immunoreactivity and behavior. pS6 induction in the posterior tuberculum (TPp:  $F_{1,15} = 8.14$ ,

207  $p=0.012$ ) and the lateral part of the ventral telencephalon (VI:  $F_{1,14}=4.88$ ,  $p=0.044$ ) were positively  
208 associated with behavior in a context-independent manner (Fig. 3). We found no significant  
209 context-dependent relationships (Table 3).

210

211

## 212 **Discussion**

213 In the present study, we sought to shed light on the neural mechanisms mediating social behavior  
214 across contexts and to understand how context is reflected at the neural level when behaviors are  
215 shared across distinct social contexts. To do so, we characterized neural activity patterns associated  
216 with shared behavioral repertoires across mating and aggression contexts in adult male guppies.

217 Adult male guppies performed highly similar behaviors in competitive and mating contexts.  
218 Extensive work has demonstrated that male guppies use alternative behavioral strategies under  
219 differing environmental conditions (e.g. predation threat, female receptivity, light levels, food  
220 availability) (reviewed in Houde, 1997; Magurran, 2005), yet competitive interactions between  
221 males have rarely been considered (but see Houde, 1988; Fischer et al., 2016). Our data suggest  
222 that, under the same environmental conditions, guppies direct similar behaviors with similar  
223 frequencies towards competitive (i.e. male) and mating (i.e. female) social partners (see also  
224 Fischer et al., 2016). Given previous work documenting behavioral flexibility in guppies in  
225 response to contextual factors including the presence of predators, abiotic differences, the  
226 reproductive state of females, and a choice between same sex or opposite sex social partners  
227 (reviewed in Houde, 1997; Magurran, 2005), we suggest that alternative contextual factors are  
228 more important in modifying the frequency and type of behaviors males direct at male versus  
229 female conspecifics.

230 Despite the lack of behavioral differences between contexts, mating and aggression present  
231 distinct challenges and opportunities for males and we therefore expected social context to be  
232 encoded at the neural level. Indeed, we observed that neural activation increased in the preoptic  
233 area (POA) of males following interactions with female – but not male – conspecifics. The  
234 identification of neural activity differences in the POA associated with distinct social contexts is  
235 in line with the functionally-conserved role of the POA in regulating social and sexual behavior in  
236 fish and other vertebrates.



237 The POA is an evolutionarily ancient brain region that is largely homologically, molecularly,  
238 and functionally conserved across vertebrates. POA activity in general, and in particular arginine  
239 vasotocin (the teleost homolog of the mammalian nonapeptide arginine vasopressin; Foran and  
240 Bass, 1999; Semsar et al., 2001; Larson et al., 2006; Godwin and Thompson, 2012; O’Connell et  
241 al., 2012; Ramallo et al., 2012) and sex-steroid hormone (Forlano et al., 2005; Forlano et al., 2010;  
242 Munchrath and Hofmann, 2010) signaling play a central role in regulating social and sexual  
243 behaviors (reviewed in O’Connell and Hofmann 2011). In male fish, electrical stimulation of the  
244 POA has been shown to increase reproductive behaviors (Demski and Knigge, 1971; Satou et al.,  
245 1984; Wong, 2000) and decrease aggression (Demski and Knigge, 1971), while ablation of the  
246 POA eliminates spawning reflexes (Macey et al., 1974). Although male guppies perform the same  
247 behaviors across mating and aggression contexts, copulation is only possible in interactions with  
248 females and differences in POA activation may be related to this critical distinction. Indeed,  
249 increased POA immediate early gene activity has been observed in response to sexual – but not  
250 aggressive – interactions in voles (Wang et al., 1997) and birds (Alger and Ritters, 2006; Alger et  
251 al., 2009; Ritters and Ball, 1999). Moreover, although no data are available outside of mammals,  
252 the POA has been shown to be necessary for ejaculation in rodents and monkeys (Malsbury, 1971;  
253 Slimp et al., 1978). As internal fertilization is rare in fish, guppies provide a unique system in  
254 which to more explicitly examine mechanistic convergence of ejaculation behavior in future. Our  
255 observations add to the body of work documenting widespread functional conservation of the POA  
256 in regulating social behavior across vertebrates and demonstrate a role for differential POA activity  
257 across social contexts, even when the behaviors performed across those contexts are shared.

258 In addition to identifying brain regions reflecting social context differences, we asked whether  
259 neural activation in some regions predicted behavior, either in a context-dependent or -independent  
260 manner. We did not identify any regions with context-dependent associations, but did identify two  
261 brain regions in which levels of activation were positively associated with the number of behaviors  
262 performed in both aggressive and mating contexts: the posterior tuberculum (TPp) and the lateral  
263 part of the ventral telencephalon (VI). Homologies of the TPp and VI to mammalian brain regions  
264 remain somewhat contentious (Northcutt, 2008; Vargas et al., 2009). In fish, the TPp is generally  
265 proposed to be homologous to part of the mammalian ventral tegmental area (VTA), and VI,  
266 together with the ventral part of the ventral telencephalon (Vv), is the putative homolog of the  
267 mammalian lateral septum (LS) (Rink and Wullimann, 2001; Rink and Wullimann, 2004).

268 Acknowledging ongoing controversy concerning these homologies, we interpret our findings in  
269 view of what is currently known about these regions from fish and other vertebrates.

270 The VTA is a central component of the dopaminergic reward system, which plays a critical  
271 role in evaluating stimulus salience and motivating behavior. The LS receives projections from the  
272 VTA as well as the hippocampus, the hypothalamus, and the midbrain (Meibach and Siegel, 1977;  
273 Staiger and Nürnberger, 1989; Swanson and Cowan, 1979). It plays a role in both sexual and social  
274 behavior, in particular in the context of social memory, social recognition, and evaluating stimulus  
275 novelty (Bielsky et al., 2005; Dantzer et al., 1988; Landgraf et al., 1995; Liebsch et al., 1996;  
276 Maeda and Mogenson, 1981). In short, both regions are critical in evaluating, responding to, and  
277 retaining social information. Moreover, the connections between these two regions are thought to  
278 be particularly important in modulating goal-directed behavior (reviewed in O'Connell and  
279 Hofmann, 2011). Given that all behaviors we assayed are typically directed at other individuals,  
280 and that we found group independent associations between neural activity and behavior in these  
281 particular regions, we propose that increased neural induction in these regions is associated with  
282 increased social behavioral motivation across contexts.

283 Though the majority of functional studies on behavioral motivation come from mammals,  
284 substantial work in song birds provides a particularly interesting comparison, as birds perform  
285 very similar singing behaviors across social contexts, analogous to the similarities in behavior  
286 across contexts we observed in guppies. Moreover, songbirds' motivation to sing is clearly distinct  
287 from their ability to sing, as the latter is controlled by a well-defined set of song nuclei in the brain,  
288 while the former is controlled largely by the POA, the VTA, and the LS (reviewed in Riters, 2012).  
289 Increased singing behavior is associated with increased neural induction in the VTA during both  
290 sexual and agonistic encounters (Bharati and Goodson, 2006; Heimovics and Riters, 2005; Maney  
291 and Ball, 2003). Lesion and electrophysiological studies link activity in the VTA to proper  
292 production of sexual song (Hara et al., 2007; Huang and Hessler, 2008; Yanagihara and Hessler,  
293 2006), and LS lesions disrupt aggressive responses to territory intrusion (Ramirez et al., 1988).

294 As in birds, the context-independent association we observed between activation in VTA and  
295 LS homologues and behavior may reflect evaluation of social stimuli and motivation to respond  
296 to these stimuli generally. Parallel patterns of activity and association with behavior in TPp and VI  
297 are consistent with the hypothesis that connections between these brain regions play a role in  
298 mediating their activity and, by extension, behavioral output (Maeda and Mogenson, 1981).

299 Importantly, our observation that TPp and VI activation are positively associated with behavioral  
300 activity regardless of context suggests that individual behavioral differences may stem largely  
301 from differences in motivation that are independent of social context. Thus, integration of social,  
302 other external, and internal cues, may be able to modulate TPp and VI activity to modify behavioral  
303 motivation across social as well as other behavioral contexts.

304

### 305 *Conclusions*

306 Although male guppies performed similar behaviors in competitive versus mating contexts,  
307 we observed distinct patterns of activation associated with social context and behavioral output at  
308 the neural level. Induction of pS6 in the POA differed based on the social context male guppies  
309 experienced, while pS6 activation in TPp and VI was positively associated with behavioral output.  
310 Taken together, the patterns we observe support a model in which distinct aspects of behavior are  
311 mediated by a balance of activity across distributed nodes of the SDMN (Teles et al., 2015), such  
312 that activity in distinct brain regions reflects behavioral context versus social motivation in a  
313 species in which behavioral repertoires are shared across social contexts.

314

315

### 316 **Acknowledgements**

317 We thank the members of the Guppy Lab for help with fish care.

318

### 319 **Competing interests**

320 The authors have no competing interests.

321

### 322 **Funding**

323 We gratefully acknowledge support from the National Science Foundation (NSF IOS-1354755 to  
324 KLH).

325

### 326 **Data availability**

327 The guppy brain atlas is available in the Supplementary Material associated with this manuscript  
328 and on our lab website. Raw data are available upon request.

329 **Tables & figures**

330

**Table 1.** Summary of tests for group differences in behavior

| <b>behavior</b>   | <b>df</b> | <b>F</b> | <b>p</b> |
|-------------------|-----------|----------|----------|
| sigmoid display   | 1,18      | 3.89     | 0.064    |
| sigmoid duration  | 1,18      | 3.74     | 0.069    |
| gonopodial thrust | 1,18      | 3.60     | 0.074    |
| gonopodial swing  | 1,18      | 4.39     | 0.051    |
| contacts          | 1,18      | 0.96     | 0.334    |
| posturing         | 1,18      | 4.25     | 0.054    |
| total behaviors   | 1,18      | 1.80     | 0.197    |

331

**Table 2.** Posthoc analyses of regional differences in neural induction

| <b>brain region</b> | <b>df</b> | <b>F</b> | <b>p</b>     |
|---------------------|-----------|----------|--------------|
| aTn                 | 2,1838    | 1.57     | 0.208        |
| Dc                  | 2,1838    | 2.12     | 0.121        |
| Dd                  | 2,1838    | 0.37     | 0.688        |
| Dld                 | 2,1838    | 0.98     | 0.376        |
| Dlv                 | 2,1838    | 2.28     | 0.103        |
| Dm                  | 2,1838    | 0.23     | 0.793        |
| Dp                  | 2,1838    | 2.51     | 0.082        |
| POA                 | 2,1838    | 6.79     | <b>0.001</b> |
| TPp                 | 2,1838    | 1.67     | 0.188        |
| Vd                  | 2,1838    | 0.13     | 0.878        |
| VH                  | 2,1838    | 1.27     | 0.280        |
| VI                  | 2,1838    | 0.67     | 0.512        |
| Vv                  | 2,1838    | 0.49     | 0.616        |

332

**Table 3.** Test of brain region dependent and independent associations between neural induction and behavior

| brain region | df   | region |              | social context*region |       |
|--------------|------|--------|--------------|-----------------------|-------|
|              |      | F      | p            | F                     | p     |
| aTn          | 1,15 | 2.29   | 0.151        | 1.34                  | 0.266 |
| Dc           | 1,16 | 0.61   | 0.447        | 0.71                  | 0.412 |
| Dd           | 1,16 | 1.28   | 0.275        | 0.05                  | 0.832 |
| Dld          | 1,16 | 0.65   | 0.432        | 0.86                  | 0.368 |
| Dlv          | 1,15 | 0.29   | 0.596        | 0.49                  | 0.493 |
| Dm           | 1,16 | 0.92   | 0.352        | 1.88                  | 0.189 |
| Dp           | 1,14 | 0.00   | 0.993        | 0.46                  | 0.509 |
| POA          | 1,15 | 2.12   | 0.166        | 2.14                  | 0.164 |
| TPp          | 1,15 | 8.14   | <b>0.012</b> | 0.72                  | 0.409 |
| Vd           | 1,15 | 0.59   | 0.453        | 0.23                  | 0.639 |
| VH           | 1,13 | 1.10   | 0.313        | 1.88                  | 0.194 |
| VI           | 1,14 | 4.88   | <b>0.044</b> | 0.01                  | 0.909 |
| Vv           | 1,16 | 0.00   | 0.972        | 0.03                  | 0.871 |

333

334 **Figure 1.** Overview of neuroanatomical atlas used for quantification of neural activation. (A – D)  
335 Representative sections of the telencephalon. We quantified neural induction in 14 candidate  
336 regions (shaded grey). (E) Representative image of pS6 immunohistochemical staining from Vv.  
337 aTn = the anterior tuberal nucleus; Dc = central part of the dorsal telencephalon; Dd = dorsal part  
338 of the dorsal telencephalon; Dld = dorsolateral part of the dorsal telencephalon; Dlv = ventrolateral  
339 part of the dorsal telencephalon (presumptive homologue of the mammalian hippocampus); Dm =  
340 medial part of the dorsal telencephalon; Dp = posterior part of the dorsal telencephalon; POA =  
341 preoptic area; Tpp = the posterior tuberculum; Vc/Vd = dorsal and central parts of the ventral  
342 telencephalon (presumptive homolog of the mammalian nucleus accumbens and striatum); VH =  
343 ventral hypothalamus; Vl = lateral part of the ventral telencephalon (presumptive homologue of  
344 the mammalian lateral septum); Vv = ventral part of the ventral telencephalon (presumptive  
345 homologue of the mammalian lateral septum).

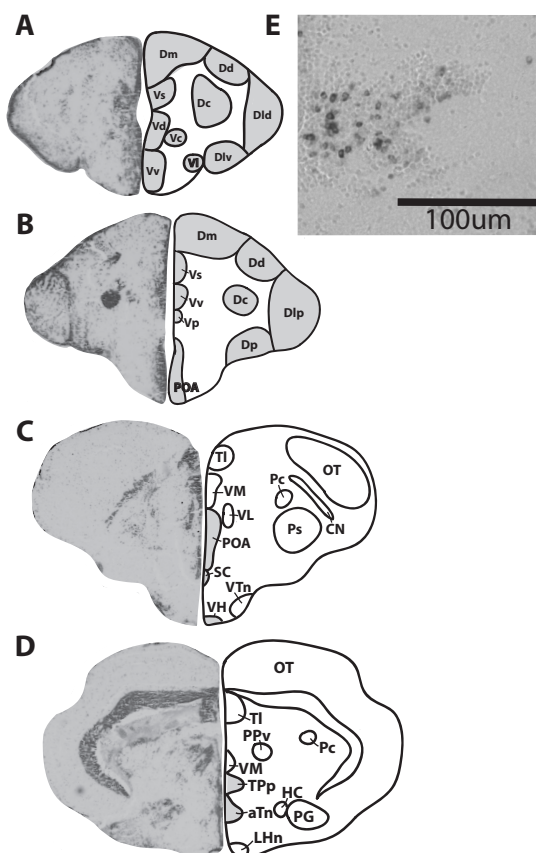

346

347 **Figure 2.** Differences in neural induction in the POA. Male guppies who experienced the mating  
348 context showed increased neural activation as compared to isolated fish and those in the aggression  
349 context. Model-estimated numbers of pS6 positive cells per section, rather than raw cell counts,  
350 are plotted. Circles overlaid on boxplots represent estimated, average cell number for each  
351 individual. Asterisks indicate p-values: \*  $\leq 0.05$ , \*\*  $\leq 0.01$ .

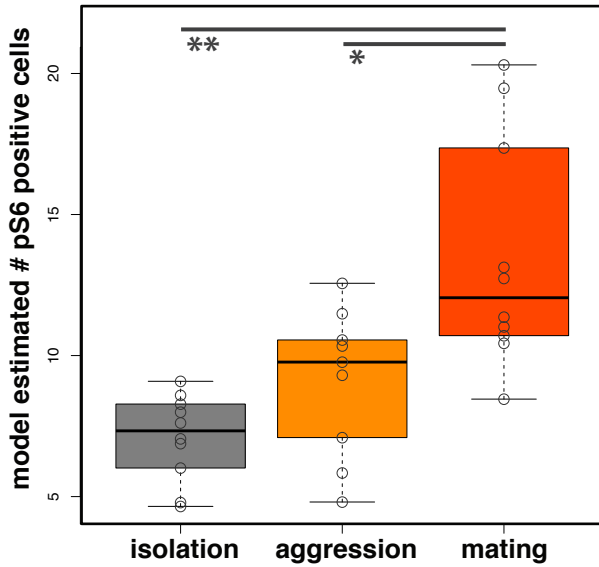

352



353 **Figure 3.** Relationship between neural activity and behavior. Increased neural induction in **(A)** the  
354 TPp and **(B)** VI was associated with an increased number of total behaviors independent of social  
355 context (aggression = white circles, mating = grey circles). Model-estimated numbers of pS6  
356 positive cells per section for each individual, rather than raw cell counts, are plotted.

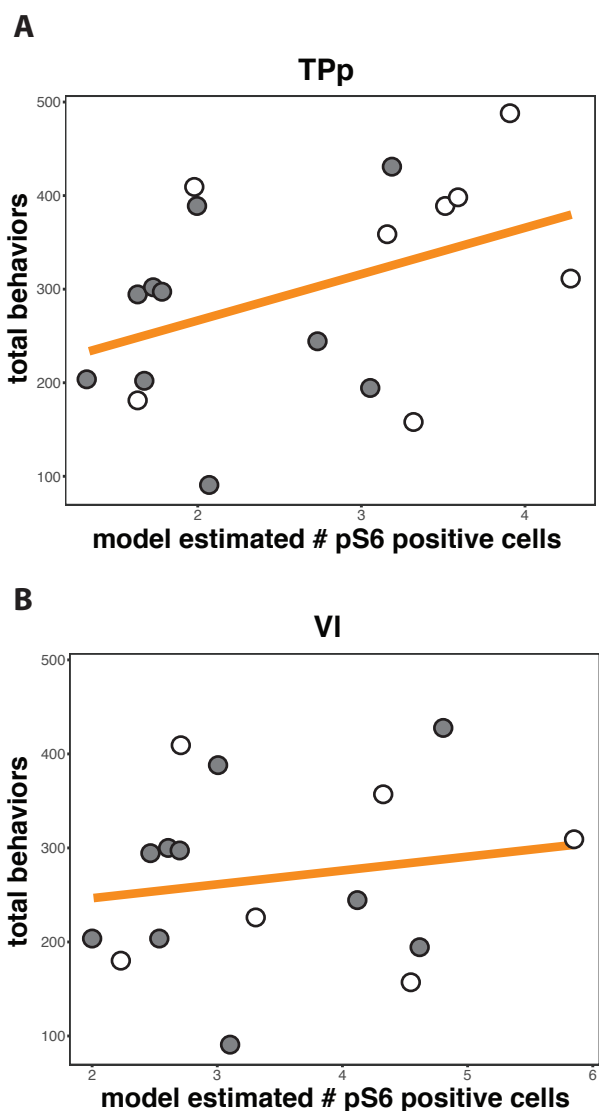

357

358 **Supplemental Materials**

359

360 **Figure S1:** Neuroanatomical atlas of the guppy brain.

## NEUROANATOMICAL ATLAS OF THE TRINIDADIAN GUPPY BRAIN (*POECILIA RETICULATA*)

Eva K. Fischer & Kim L. Hoke

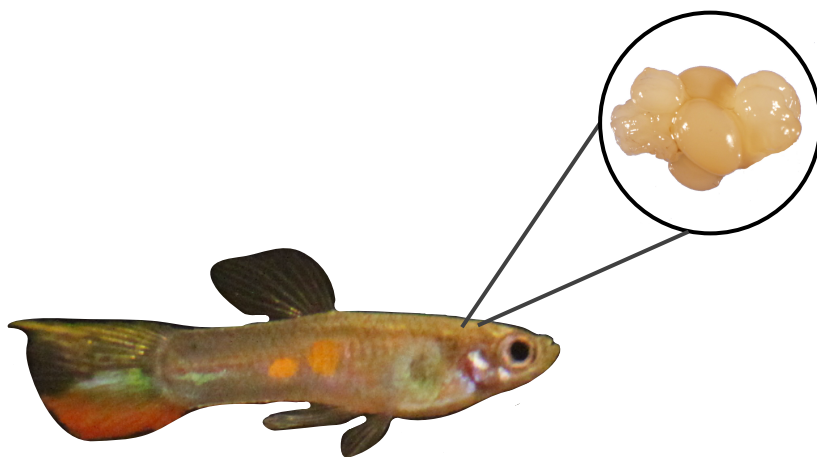

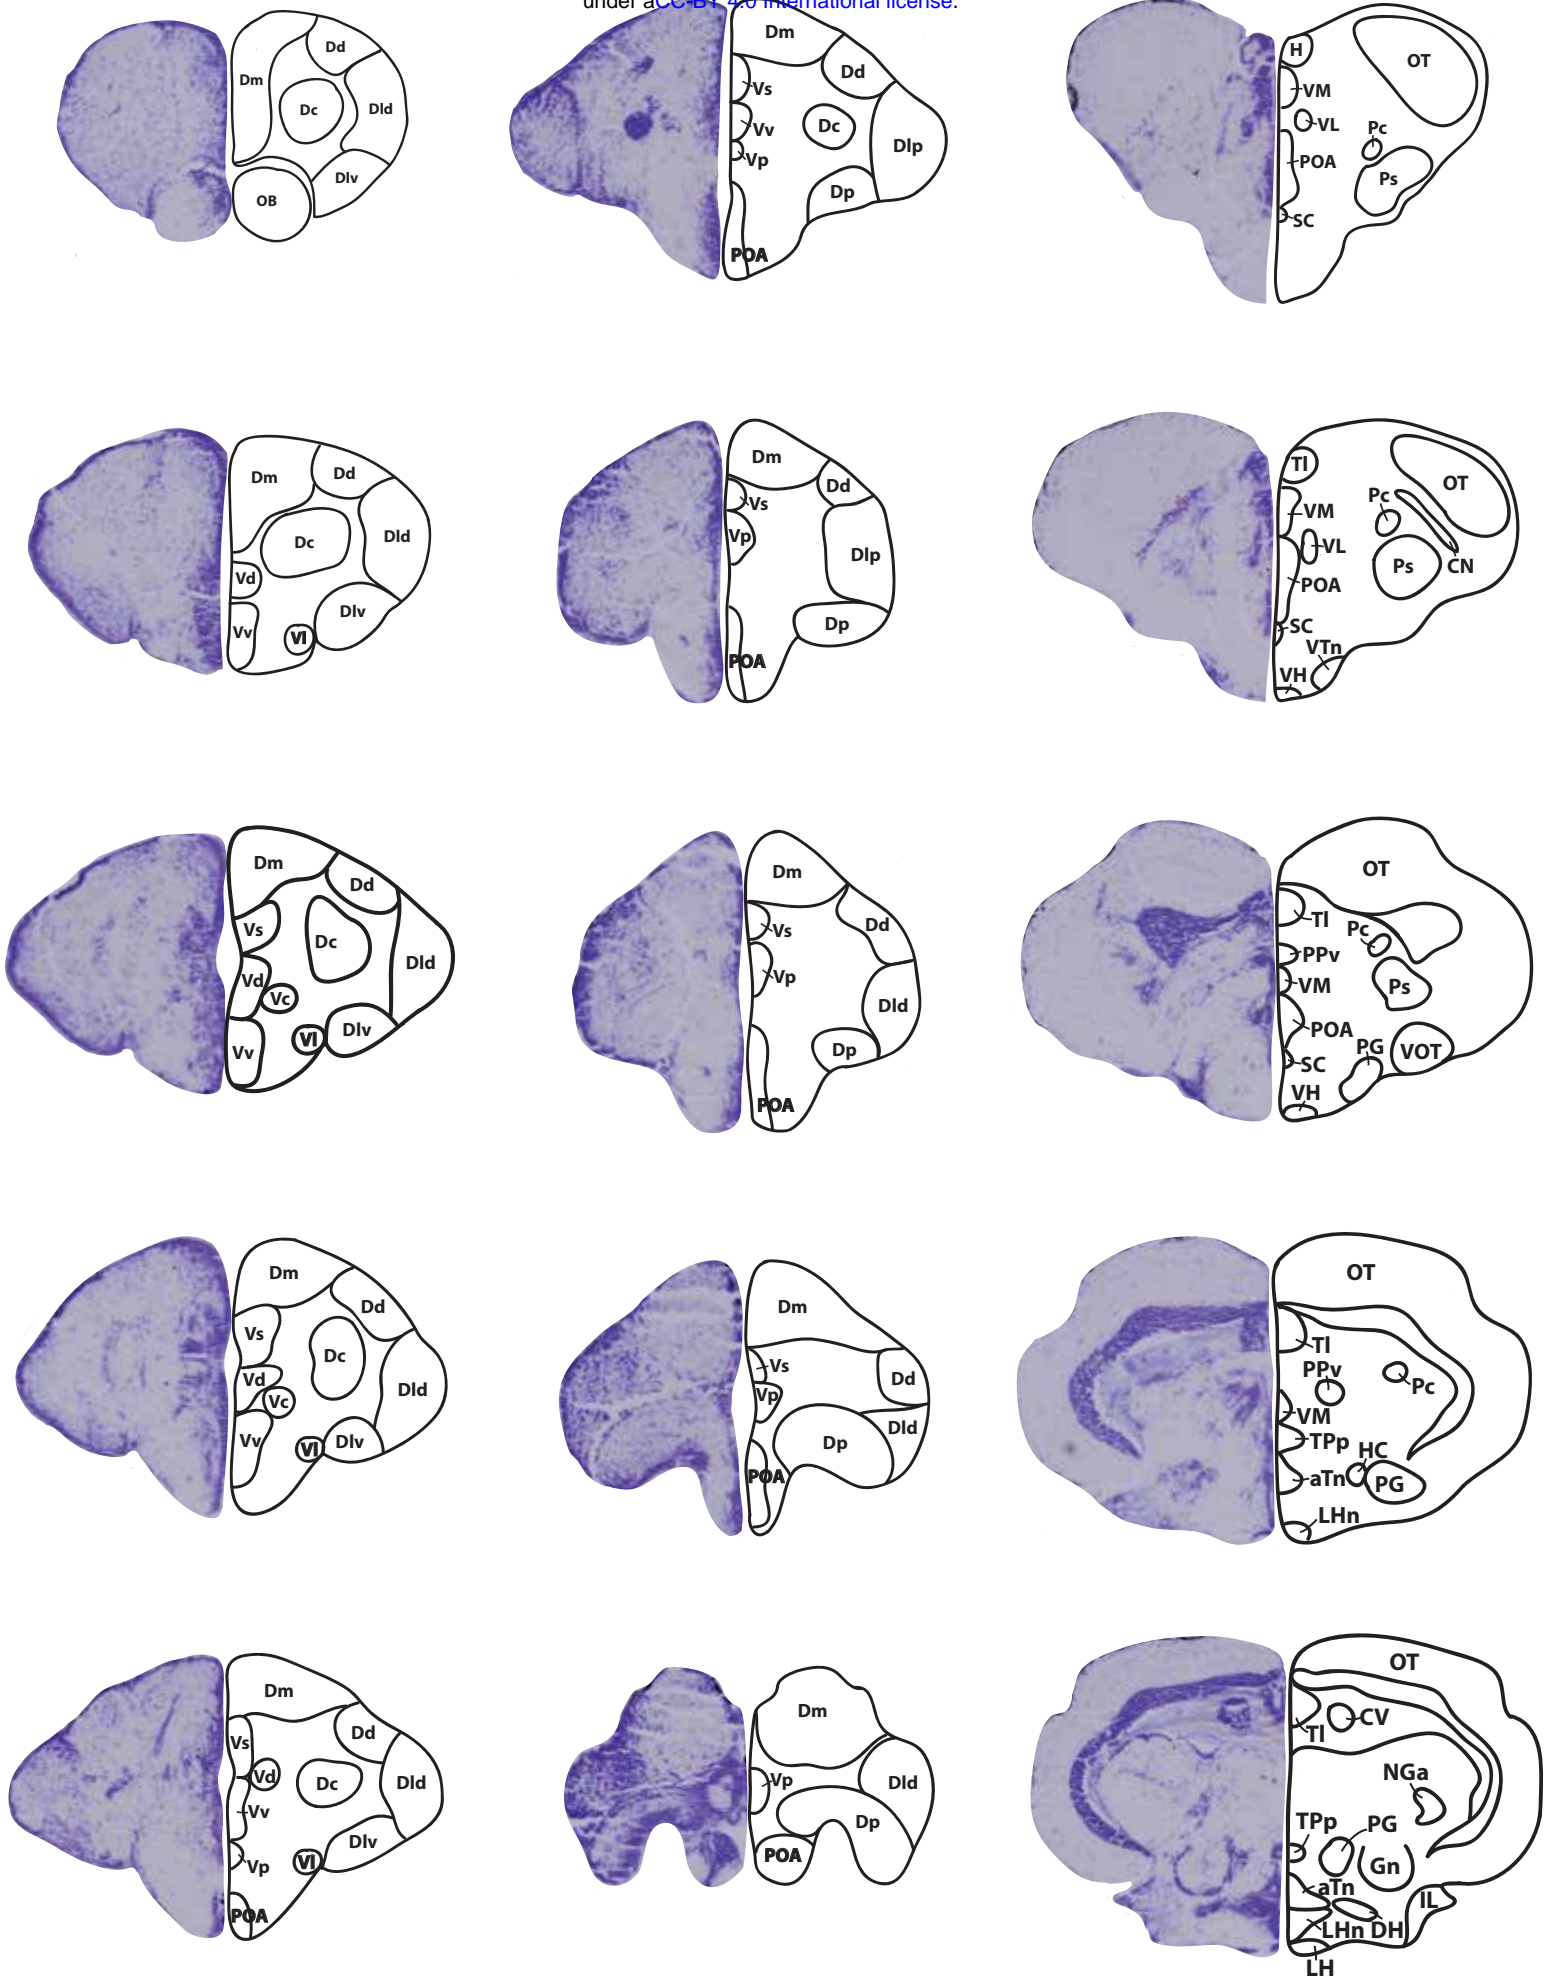

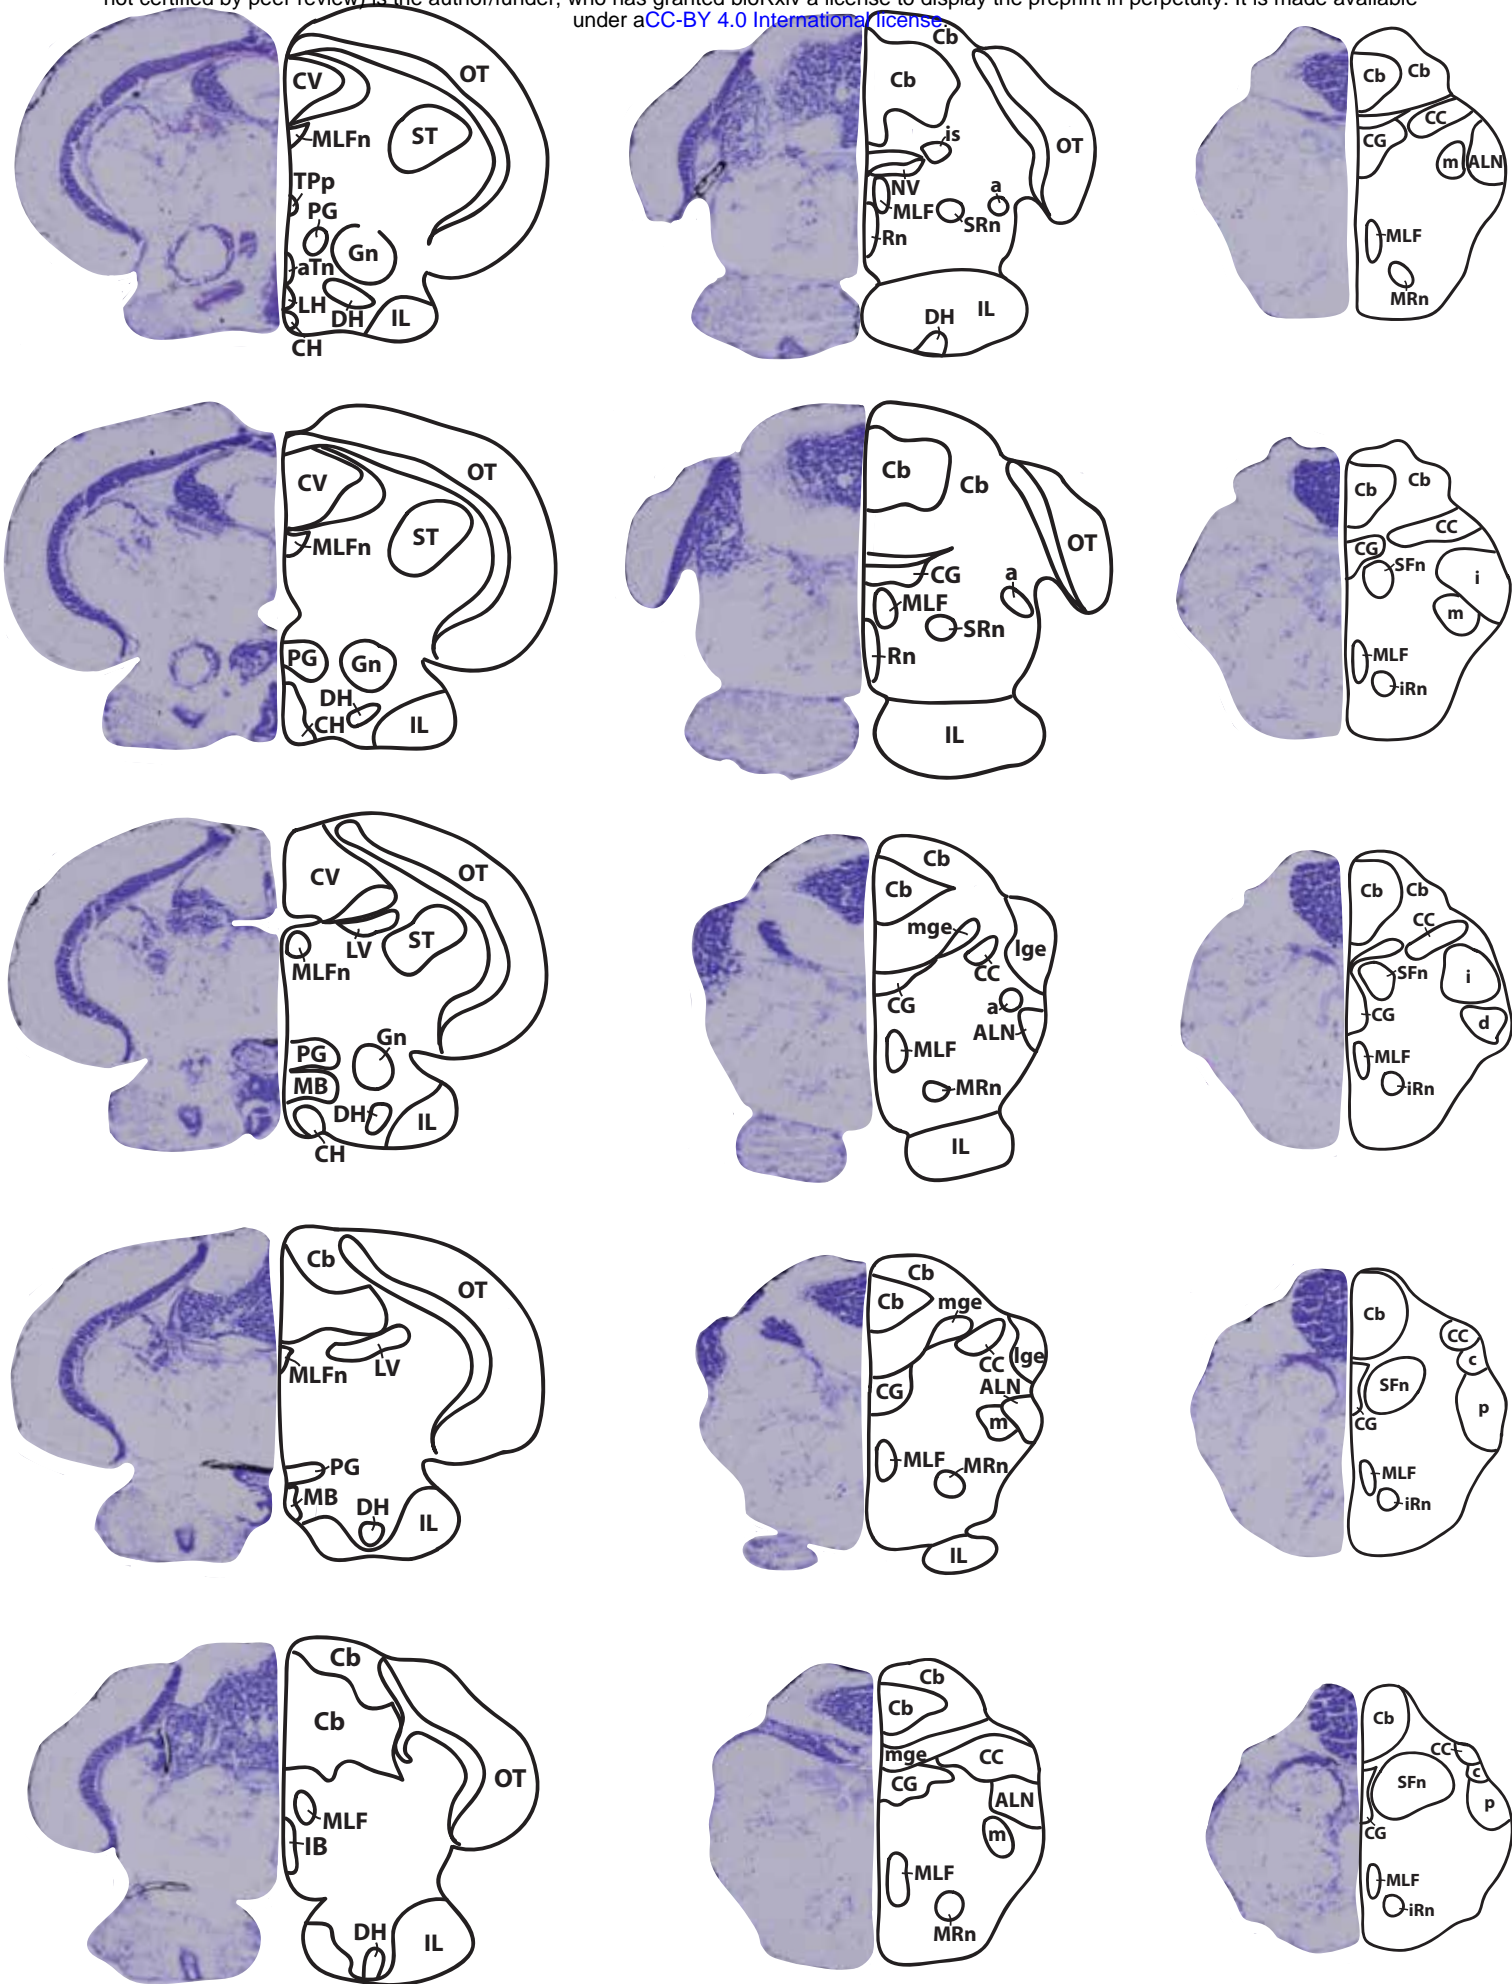

|     |                                            |      |                                                     |
|-----|--------------------------------------------|------|-----------------------------------------------------|
| a   | anterior nucleus of AOL                    | LV   | lateral valvular nucleus                            |
| aGn | anterior glomerular nucleus                | m    | magnocellular nucleus of AOL                        |
| ALN | anterior lateral line nerve                | MB   | mammillary bodies                                   |
| AOL | area octavolateralis                       | mge  | medial granular eminence                            |
| aTn | anterior tuberal nucleus                   | MLF  | medial longitudinal fascicle                        |
| c   | caudal nucleus of AOL                      | MLFn | nucleus of the medial longitudinal fascicle         |
| Cb  | cerebellum                                 | MRn  | medial reticular nucleus                            |
| CC  | cerebellar crest                           | OB   | olfactory bulb                                      |
| CG  | central grey                               | OT   | optic tectum                                        |
| CH  | caudal hypothalamus                        | p    | posterior nucleus of AOL                            |
| CN  | cortical nucleus                           | Pc   | central pretectal nucleus                           |
| CV  | cerebellar valvula                         | PG   | preglomerular nucleus                               |
| D   | dorsal (pallial) part of the telencephalon | POA  | preoptic area                                       |
| d   | descendent nucleus of AOL                  | PPv  | ventral periventricular pretectal nucleus           |
| Dc  | central part of D                          | Ps   | superficial pretectal nucleus                       |
| Dd  | dorsal part of D                           | RN   | raphe nucleus                                       |
| DH  | dorsal hypothalamus                        | SC   | suprachiasmatic nucleus                             |
| DI  | lateral part of D                          | SFn  | nucleus of the solitary fascicle                    |
| Dld | dorsal part of DI                          | SRn  | superior reticular nucleus                          |
| Dlv | ventral part of DI                         | ST   | semicircular torus                                  |
| Dm  | medial part of D                           | TPp  | periventricular nucleus of the posterior tuberculum |
| Dp  | posterior part of D                        | V    | ventral (subpallial) division of the telencephalon  |
| Gn  | glomerular nucleus                         | Vc   | central part of V                                   |
| H   | habenula                                   | Vd   | dorsal nucleus of V                                 |
| HC  | horizontal commissure                      | VH   | ventral hypothalamus                                |
| i   | intermediate nucleus of AOL                | VH   | ventral hypothalamus                                |
| IB  | interpeduncular body                       | VI   | lateral part of V                                   |
| IL  | inferior lobe                              | VL   | ventrolateral nucleus                               |
| iRn | inferior reticular nucleus                 | VM   | ventromedial thalamic nucleus                       |
| IS  | isthmus nucleus                            | VOT  | ventral optic tract                                 |
| IS  | isthmus nucleus                            | Vp   | postcommissural nucleus of V                        |
| lge | lateral granular eminence                  | Vs   | supracommissural nucleus of V                       |
| LH  | lateral hypothalamus                       | vTn  | ventral tuberal nucleus                             |
| LHn | lateral hypothalamic nucleus               | Vv   | ventral part of V                                   |
| LT  | longitudinal torus                         |      |                                                     |

361 **References**

- 362 **Alger, S. J. and Riters, L. V.** (2006). Lesions to the medial preoptic nucleus differentially affect  
363 singing and nest box-directed behaviors within and outside of the breeding season in  
364 European starlings (*Sturnus vulgaris*). *Behav. Neurosci.* **120**, 1326–1336.
- 365 **Alger, S. J., Maasch, S. N. and Riters, L. V.** (2009). Lesions to the medial preoptic nucleus  
366 affect immediate early gene immunolabeling in brain regions involved in song control and  
367 social behavior in male European starlings. *Eur. J. Neurosci.* **29**, 970–982.
- 368 **Anken, R. and Rahmann, H.** (1994). *Brain atlas of the adult swordtail fish Xiphophorus helleri*  
369 *and of certain developmental stages*. Stuttgart: Fischer.
- 370 **Bharati, I. S. and Goodson, J. L.** (2006). Fos responses of dopamine neurons to sociosexual  
371 stimuli in male zebra finches. *Neuroscience* **143**, 661–670.
- 372 **Bielsky, I. F., Hu, S. B., Ren, X., Terwilliger, E. F. and Young, L. J.** (2005). The V1a  
373 vasopressin receptor is necessary and sufficient for normal social recognition: A gene  
374 replacement study. *Neuron* **47**, 503–513.
- 375 **Catchpole, C. K.** (2008). *Bird song: Biological themes and variations, second edition*.  
376 Cambridge: Cambridge University Press.
- 377 **Dantzer, R., Koob, G. F., Bluthé, R. M. and Le Moal, M.** (1988). Septal vasopressin  
378 modulates social memory in male rats. *Brain Res.* **457**, 143–147.
- 379 **Demski, L. S. and Knigge, K. M.** (1971). The telencephalon and hypothalamus of the bluegill  
380 and reproductive behavior with representative frontal sections. *J. Comp. Neurol.* **143**, 1–16.
- 381 **Fischer, E. K., Ghalambor, C. K. and Hoke, K. L.** (2016). Plasticity and evolution in  
382 correlated suites of traits. *J. Evol. Biol.* **29**, 991–1002.
- 383 **Foran, C. M. and Bass, A. H.** (1999). Preoptic GnRH and AVT: axes for sexual plasticity in  
384 teleost fish. *Gen. Comp. Endocrinol.* **116**, 141–152.
- 385 **Forlano, P. M., Deitcher, D. L. and Bass, A. H.** (2005). Distribution of estrogen receptor alpha  
386 mRNA in the brain and inner ear of a vocal fish with comparisons to sites of aromatase  
387 expression. *J. Comp. Neurol.* **483**, 91–113.
- 388 **Forlano, P. M., Marchaterre, M., Deitcher, D. L. and Bass, A. H.** (2010). Distribution of  
389 androgen receptor mRNA expression in vocal, auditory, and neuroendocrine circuits in a  
390 teleost fish. *J. Comp. Neurol.* **518**, 493–512.
- 391 **Godwin, J. and Thompson, R.** (2012). Nonapeptides and social behavior in fishes. *Horm.*

- 392 *Behav.* **61**, 230–238.
- 393 **Hara, E., Kubikova, L., Hessler, N. A. and Jarvis, E. D.** (2007). Role of the midbrain  
394 dopaminergic system in modulation of vocal brain activation by social context. *Eur. J.*  
395 *Neurosci.* **25**, 3406–3416.
- 396 **Heimovics, S. A. and Riters, L. V.** (2005). Immediate early gene activity in song control nuclei  
397 and brain areas regulating motivation relates positively to singing behavior during, but not  
398 outside of, a breeding context. *J. Neurobiol.* **65**, 207–224.
- 399 **Houde, A. E.** (1988). The effects of female choice and male-male competition on the mating  
400 success of male guppies. *Anim. Behav.* **36**, 888–896.
- 401 **Houde, A. E.** (1997). *Sex, Color, and Mate Choice in Guppies*. Princeton, NJ: Princeton  
402 University Press.
- 403 **Huang, Y. C. and Hessler, N. A.** (2008). Social modulation during songbird courtship  
404 potentiates midbrain dopaminergic neurons. *PLoS One* **3**(10): e3281.
- 405 **Knight, Z. A., Tan, K., Birsoy, K., Schmidt, S., Garrison, J. L., Wysocki, R. W., Emiliano,**  
406 **A., Ekstrand, M. I. and Friedman, J. M.** (2012). Molecular profiling of activated neurons  
407 by phosphorylated ribosome capture. *Cell* **151**, 1126–1137.
- 408 **Landgraf, R., Gerstberger, R., Montkowski, A., Probst, J. C., Wotjak, C. T., Holsboer, F.**  
409 **and Engelmann, M.** (1995). V1 vasopressin receptor antisense oligodeoxynucleotide into  
410 septum reduces vasopressin binding, social discrimination abilities, and anxiety-related  
411 behavior in rats. *J. Neurosci.* **15**, 4250–8.
- 412 **Larson, E. T., O'Malley, D. M. and Melloni, R. H.** (2006). Aggression and vasotocin are  
413 associated with dominant-subordinate relationships in zebrafish. *Behav. Brain Res.* **167**, 94–  
414 102.
- 415 **Liebsch, G., Wotjak, C. T., Landgraf, R. and Engelmann, M.** (1996). Septal vasopressin  
416 modulates anxiety-related behaviour in rats. *Neurosci. Lett.* **217**, 101–104.
- 417 **Macey, M. J., Pickford, G. E. and Peter, R. E.** (1974). Forebrain localization of the spawning  
418 reflex response to exogenous neurohypophysial hormones in the killifish, *Fundulus*  
419 *heteroclitus*. *J. Exp. Zool.* **190**, 269–279.
- 420 **Maeda, H. and Mogenson, G. J.** (1981). Electrophysiological responses of neurons of the  
421 ventral tegmental area to electrical stimulation of amygdala and lateral septum.  
422 *Neuroscience* **6**, 367-376.



- 423 **Magurran, A. E.** (2005). *Evolutionary ecology: the Trinidadian guppy*. Oxford: Oxford  
424 University Press.
- 425 **Malsbury, C. W.** (1971). Facilitation of male rat copulatory behavior by electrical stimulation of  
426 the medial preoptic area. *Physiol. Behav.* **7**, 797–805.
- 427 **Maney, D. L. and Ball, G. F.** (2003). Fos-like immunoreactivity in catecholaminergic brain  
428 nuclei after territorial behavior in free-living song sparrows. *J. Neurobiol.* **56**, 163–170.
- 429 **Meibach, R. C. and Siegel, A.** (1977). Efferent connections of the septal area in the rat: An  
430 analysis utilizing retrograde and anterograde transport methods. *Brain Res.* **119**, 1–20.
- 431 **Munchrath, L. A. and Hofmann, H. A.** (2010). Distribution of sex steroid hormone receptors  
432 in the brain of an african cichlid fish, *Astatotilapia burtoni*. *J. Comp. Neurol.* **518**, 3302–  
433 3326.
- 434 **Northcutt, R. G.** (2008). Forebrain evolution in bony fishes. *Brain Res. Bull.* **75**, 191–205.
- 435 **O’Connell, L. A. and Hofmann, H. A.** (2011). The Vertebrate mesolimbic reward system and  
436 social behavior network: A comparative synthesis. *J. Comp. Neurol.* **519**, 3599–3639.
- 437 **O’Connell, L. A., Matthews, B. J. and Hofmann, H. A.** (2012). Isotocin regulates paternal  
438 care in a monogamous cichlid fish. *Horm. Behav.* **61**, 725–733.
- 439 **Portfors, C. V.** (2007). Types and functions of ultrasonic vocalizations in laboratory rats and  
440 mice. *J. Am. Assoc. Lab. Anim. Sci.* **46**, 28–34.
- 441 **Ramallo, M. R., Grober, M., Canepa, M. M., Morandini, L. and Pandolfi, M.** (2012).  
442 Arginine-vasotocin expression and participation in reproduction and social behavior in  
443 males of the cichlid fish, *Cichlasoma dimerus*. *Gen. Comp. Endocrinol.* **179**, 221–231.
- 444 **Ramirez, M. J., Salas, C. and Portavella, M.** (1988). Offense and defense after lateral septal  
445 lesions in *Columba Livia*. *Int. J. Neurosci.* **41**, 241–250.
- 446 **Rink, E. and Wullimann, M. F.** (2001). The teleostean (zebrafish) dopaminergic system  
447 ascending to the subpallium (striatum) is located in the basal diencephalon (posterior  
448 tuberculum). *Brain Res.* **889**, 316–330.
- 449 **Rink, E. and Wullimann, M. F.** (2004). Connections of the ventral telencephalon (subpallium)  
450 in the zebrafish (*Danio rerio*). *Brain Res.* **1011**, 206–220.
- 451 **Riters, L. V.** (2012). The role of motivation and reward neural systems in vocal communication  
452 in songbirds. *Front. Neuroendocrinol.* **33**, 194–209.
- 453 **Riters, L. V. and Ball, G. F.** (1999). Lesions to the medial preoptic area affect singing in the

- 454 male European starling (*Sturnus vulgaris*). *Horm Behav* **36**, 276–286.
- 455 **Satou, M., Oka, Y., Kusunoki, M., Matsushima, T., Kato, M., Fujita, I. and Ueda, K.**  
456 (1984). Telencephalic and preoptic areas integrate sexual behavior in hime salmon  
457 (landlocked red salmon, *Oncorhynchus nerka*): Results of electrical brain stimulation  
458 experiments. *Physiol. Behav.* **33**, 441–447.
- 459 **Schindelin, J., Arganda-Carreras, I., Frise, E., Kaynig, V., Longair, M., Pietzsch, T.,**  
460 **Preibisch, S., Rueden, C., Saalfeld, S., Schmid, B., et al.** (2012). Fiji: an open-source  
461 platform for biological-image analysis. *Nat. Methods* **9**, 676–682.
- 462 **Semsar, K., Kandel, F. L. M. and Godwin, J.** (2001). Manipulations of the AVT system shift  
463 social status and related courtship and aggressive behavior in the bluehead wrasse. *Horm.*  
464 *Behav.* **40**, 21–31.
- 465 **Slimp, J. C., Hart, B. L. and Goy, R. W.** (1978). Heterosexual, autosexual and social behavior  
466 of adult male rhesus monkeys with medial preoptic-anterior hypothalamic lesions. *Brain*  
467 *Res.* **142**, 105–122.
- 468 **Staiger, J. and Nürnbergger, F.** (1989). Pattern of afferents to the lateral septum in the guinea  
469 pig. *Cell Tissue Res.* **257**, 471–490.
- 470 **Swanson, L. and Cowan, W.** (1979). The connections of the septal region in the rat. *J. Comp.*  
471 *Neurol.* **186**, 621–656.
- 472 **Teles, M. C., Almeida, O., Lopes, J. S., Oliveira, R. F., Newman, S., Goodson, J., Adinoff,**  
473 **B., O’Connell, L., Hofmann, H., O’Connell, L., et al.** (2015). Social interactions elicit  
474 rapid shifts in functional connectivity in the social decision-making network of zebrafish.  
475 *Proc. Biol. Sci.* **282**, 20151099.
- 476 **Vargas, J. P., López, J. C. and Portavella, M.** (2009). What are the functions of fish brain  
477 pallium? *Brain Res. Bull.* **79**, 436–440.
- 478 **Wang, Z., Hulihan, T. J. and Insel, T. R.** (1997). Sexual and social experience is associated  
479 with different patterns of behavior and neural activation in male prairie voles. *Brain Res*  
480 **767**, 321–332.
- 481 **Wells, K.** (2007). *The Ecology & Behavior of Amphibians*. Chicago: University of Chicago  
482 Press.
- 483 **Wong, C. J. H.** (2000). Electrical stimulation of the preoptic area in *Eigenmannia* : evoked  
484 interruptions in the electric organ discharge. *J. Comp. Physiol. A Sensory, Neural, Behav.*

485 *Physiol.* **186**, 81–93.

486 **Wullimann, M. F., Rupp, B. and Reichert, H.** (1996). *Neuroanatomy of the zebrafish brain: A*  
487 *topological atlas*. Basel: Birkhäuser.

488 **Yanagihara, S. and Hessler, N. A.** (2006). Modulation of singing-related activity in the  
489 songbird ventral tegmental area by social context. *Eur. J. Neurosci.* **24**, 3619–3627.
